# Postprandial Plasma Ghrelin Is Suppressed Proportional to Meal Calorie Content in Normal-Weight But Not Obese Subjects

C. W. le Roux, M. Patterson, R. P. Vincent, C. Hunt, M. A. Ghatei, and S. R. Bloom

*Department of Metabolic Medicine, Hammersmith Hospital, Imperial College London, W12 0NN United Kingdom*

Circulating levels of the gastric hormone ghrelin rise before and decrease after a meal. In normal-weight subjects, postprandial suppression of ghrelin is proportional to calories consumed. Obese individuals have lower fasting ghrelin levels; however, it is unclear whether the obese show normal postprandial suppression. This study aimed to compare postprandial ghrelin responses in normal-weight and obese subjects, using mixed macronutrient meals with varied fat and calorie content. Postprandial ghrelin response was measured in normal-weight insulin-sensitive subjects and obese insulin-resistant subjects, after six test meals with different fat and calorie content (250–3000 kcal). Increasing the calorie content

of meals in normal-weight subjects progressively lowered nadir levels of ghrelin. The obese had lower fasting ghrelin levels, and the reduction after the consumption of all test meals was less than the normal-weight subjects. The lowest postprandial levels in the obese were no different to the nadir in normal-weight volunteers after 1000-, 2000-, and 3000-kcal meals. Thus, circulating ghrelin levels decreased in normal-weight subjects after mixed meals. Obese subjects demonstrated a much reduced ghrelin postprandial suppression. This reduced suppression may influence satiety, thus reinforcing obesity. (*J Clin Endocrinol Metab* 90: 1068–1071, 2005)

GHRELIN IS A 28-amino acid peptide produced in the stomach (1) and is the endogenous ligand for the GH secretagogue receptor (1). Central and peripheral administration leads to increased food intake in rodents and humans (2–4). Ghrelin has also been postulated to increase appetite while acting as a meal initiator (2–6).

Circulating plasma ghrelin levels increase before a meal and decrease after the consumption of nutrients (6). Gastric distension, as achieved by infusion of water into the stomach, does not lead to ghrelin reduction (2, 7); however, ingestion of nonnutritive fiber does decrease ghrelin levels (8). Although obese patients with Prader-Willi syndrome, which is characterized by hyperphagia and obesity, have elevated ghrelin levels (9), the concentrations of fasting ghrelin in the majority of obese subjects are lower than normal-weight volunteers (9, 10). Insulin resistance has recently been postulated to play a role in determining this lower plasma ghrelin level in the obese (11). It is currently unclear whether postprandial plasma ghrelin levels are normally suppressed in the obese. Some authors have suggested that ghrelin is not suppressed postprandially in the obese (12); however, others have shown that an attenuated reduction occurs (13, 14).

In humans, postprandial suppression of ghrelin is proportional to the calories consumed, although the suppression did not correlate with the interval between meals (15). In diet-induced obese rats, plasma ghrelin at the onset of the dark phase was 29% lower compared with diet-resistant rats, but plasma ghrelin levels were equivalent 6 h later, suggest-

ing less suppression in obese rats (16). Most studies have used mixed or carbohydrate-rich test meals, which classically suppress ghrelin levels and measurements of hunger (13–15). In contrast, some authors have found that protein- and fat-rich meals may increase ghrelin levels (17, 18), while hunger is still suppressed similarly to carbohydrate-rich meals. Thus, ghrelin suppression may depend on the macronutrient content of meals (17).

The aim of this study was to compare postprandial ghrelin responses in normal-weight and obese subjects given mixed-macronutrient meals of 250, 500, 1000, 2000, and 3000 kcal, with calorie content adjusted by fat content.

## Subjects and Methods

### Experimental subjects

All studies were performed according to the principles of the Declaration of Helsinki and approved by the local research and ethics committee at the Hammersmith Hospital. Written informed consent was obtained from all subjects. Exclusion criteria included chronic medical or psychiatric illness, pregnancy, substance abuse, more than two alcoholic drinks per day, and aerobic exercise for more than 30 min three times per week.

We evaluated the postprandial ghrelin response to a series of six standard meals (Table 1) in 20 obese (age, mean  $\pm$  SEM,  $29.0 \pm 2.0$  yr) and 20 lean subjects ( $28.6 \pm 1.6$  yr) who were all at a stable body mass index of  $40.3 \pm 1.1$  kg/m<sup>2</sup> and  $21.7 \pm 0.4$  kg/m<sup>2</sup>, respectively. Each group consisted of 14 females and six males. Insulin resistance was assessed by determining the homeostasis model assessment insulin resistance index, which is calculated as follows: fasting glucose (mm)  $\times$  fasting insulin (mU/liter)/22.5 (19). All the obese subjects were insulin resistant as indicated by a homeostasis model assessment insulin resistance index of  $4.2 \pm 0.4$  compared with  $0.9 \pm 0.1$  in the normal-weight subjects. Fasting insulin levels were  $17.0 \pm 1.7$  mU/liter in the obese subjects and  $4.4 \pm 0.3$  mU/liter in the normal-weight subjects.

First Published Online November 2, 2004

Abbreviation: AUC, Area under the curve.

JCEM is published monthly by The Endocrine Society (<http://www.endo-society.org>), the foremost professional society serving the endocrine community.

**TABLE 1.** Macronutrient content of the standard test meals

|             | CHD (g) | Fat (g) | Protein (g) |
|-------------|---------|---------|-------------|
| 500-ml meal |         |         |             |
| 250 kcal    | 42.3    | 10.2    | 16          |
| 500 kcal    | 52      | 26.5    | 18          |
| 1000 kcal   | 63.3    | 75.3    | 17.1        |
| 900-ml meal |         |         |             |
| 1000 kcal   | 99      | 52.9    | 32.6        |
| 2000 kcal   | 107.5   | 161.7   | 29.5        |
| 3000 kcal   | 94.5    | 274.9   | 24.7        |

CHD, Carbohydrate.

### Materials and methods

The subjects were randomly allocated to two subgroups. Each subgroup consisted of 10 lean and 10 obese subjects each. Each subject visited the hospital on three occasions after a 12-h overnight fast and received, in random order and in a blinded fashion, either a 500-ml liquid meal (250, 500, and 1000 kcal) or a 900-ml meal (1000, 2000, and 3000 kcal). Subjects were blinded as to the calorie content of each meal. Table 1 shows the macronutrient content of the test meals. The 1000-kcal meals given as 500 or 900 ml allowed us to investigate whether there was a major volume effect on ghrelin response. All meals had a similar taste and viscosity. Venous blood was collected 30 min before the meal and then every 30 min thereafter for 3 h after each meal. Blood samples were centrifuged, and plasma was immediately separated and stored at  $-20^{\circ}\text{C}$  until analysis.

### Hormone assays

All samples were assayed simultaneously and in duplicate to eliminate the effect of interassay variation. Ghrelin-like immunoreactivity was measured with a specific and sensitive RIA. The assay measures both octanoyl and des octanoyl ghrelin and did not cross-react with any known gastrointestinal or pancreatic peptide hormones. The antisera (SC-10368) was obtained from Santa Cruz Biotechnology (Santa Cruz, CA) and was used at a final dilution of 1:50,000. The  $^{125}\text{I}$  ghrelin was prepared using Bolton & Hunter reagent (Amersham Biosciences, Chalfont St Giles, Buckinghamshire, UK) and purified by reverse phase-HPLC using a linear gradient from 10–40% acetonitrile and 0.05% trifluoroacetic acid over 90 min. The specific activity of ghrelin label was 48 Bq/fmol. Fifty microliters of unextracted plasma were assayed. The assay was performed in a total volume of 0.7 ml of 0.06 M phosphate buffer (pH 7.2) containing 0.3% BSA and incubated for 3 d at  $4^{\circ}\text{C}$  before separation of free from antibody-bound ghrelin label by charcoal absorption. The assay detected changes of 25 pM plasma ghrelin with 95% confidence limit, with an intraassay coefficient of variation of 5.5%.

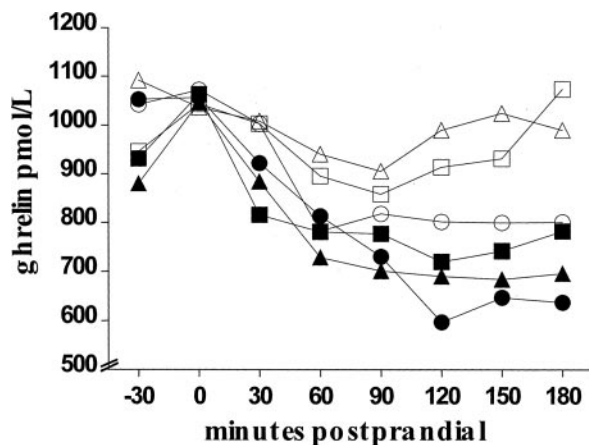

**FIG. 1.** Pre- and postprandial plasma ghrelin response in normal-weight subjects after 250 kcal (open square), 500 kcal (open triangle), and 1000 kcal (open circle) in 500 ml and 1000 kcal (filled square), 2000 kcal (filled triangle), and 3000 kcal (filled circle) in 900 ml.

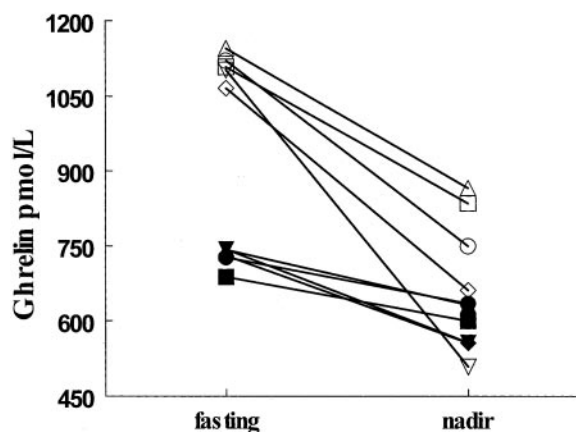

**FIG. 2.** Fasting and nadir plasma ghrelin concentrations in normal-weight (open symbols) and obese (filled symbols) subjects after 250 kcal (square), 500 kcal (triangle), 1000 kcal (circle), 2000 kcal (diamond), and 3000 kcal (inverse triangle).

### Statistical analysis

Hormone levels are expressed as means  $\pm$  SEM. Fasting and nadir levels were compared with the use of two-tailed, paired Student's *t* tests or ANOVA. Correlations were determined by univariate linear regression (GraphPad Prism, San Diego, CA). The area under the curve (AUC) was calculated using the trapezoid rule.

### Results

Fasting plasma ghrelin levels were significantly lower in the obese group ( $735.4 \pm 89.6$  pM) compared with the normal-weight group ( $1108.9 \pm 93.3$  pM;  $P < 0.001$ ). Ghrelin levels in both the normal-weight and obese groups reached a nadir between 60 and 150 min post prandially ( $P = 0.3$ ), with the median in both groups being 90 min. In normal-weight subjects, meals of higher calorie content led to lower nadir ghrelin levels ( $R^2 = 0.94$ ,  $P < 0.001$ ; Figs. 1 and 2). The reduction in ghrelin levels in the obese subjects after the consumption of the six test meals ( $R^2 = 0.63$ ,  $P = 0.06$ ) was less than the normal-weight subjects ( $P = 0.001$ ; Figs. 2 and 3). One-way ANOVA comparing nadir ghrelin levels showed significant difference in the normal-weight subjects

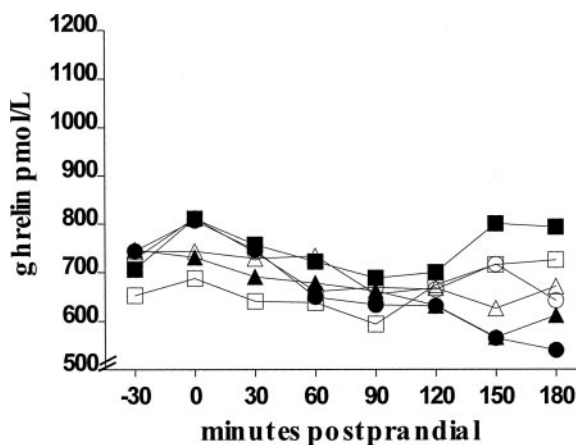

**FIG. 3.** Pre- and postprandial plasma ghrelin response in obese subjects after 250 kcal (open square), 500 kcal (open triangle), and 1000 kcal (open circle) in 500 ml and 1000 kcal (filled square), 2000 kcal (filled triangle), and 3000 kcal (filled circle) in 900 ml.

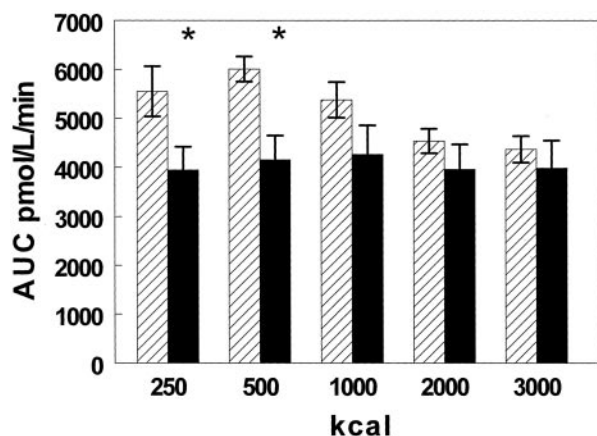

FIG. 4. AUC for normal-weight (striped bar) and obese (black bar) subjects after 250-, 500-, 1000-, 2000-, and 3000-kcal meals. \*,  $P < 0.05$ .

( $P < 0.001$ ) but not in the obese subjects ( $P = 0.737$ ). The total area AUC was significantly smaller in the obese subjects compared with normal-weight subjects for meals less than 1000 kcal ( $P < 0.04$ ; Fig. 4). For meals of 1000 kcal and more, the lower nadir levels in the normal-weight subjects led to a reduction in AUC; however, this trend was not seen in the obese subjects (Fig. 4). There was no difference between the nadir ghrelin levels in obese and normal-weight subjects after 1000-, 2000-, and 3000-kcal meals ( $P = 0.24$ ). However, nadir ghrelin levels for both groups were significantly lower after all meals (Table 2). In the two meals of 1000 kcal, doubling of the volume did not have an effect on the ghrelin profile (Figs. 1 and 3).

### Discussion

Normal-weight subjects have higher fasting ghrelin than obese subjects (10, 14) and show a calorie-dependant suppression of plasma ghrelin (15). Meals consisting of fat have recently been shown to increase ghrelin (17, 18), although other investigators have shown an attenuated suppression of ghrelin after a fat-rich meal compared with a carbohydrate-rich meal (20). We demonstrated that obese individuals do not show a calorie-dependant suppression in postprandial circulating ghrelin, but we confirmed a calorie-dependant suppression in normal-weight volunteers (15), notwithstanding the major macronutrient component of the mixed meal consisting of fat.

After 1000-, 2000-, and 3000-kcal meals in the normal-weight subjects, the nadir levels of ghrelin were similar to that of the obese subjects after 250, 500, 1000, 2000, and 3000 kcal. Doubling of the volume of the meal did not significantly affect the ghrelin profile in either the normal-weight or obese subjects, suggesting that gastric distension was not responsible for the postprandial ghrelin response.

The meals in this study did not consist of single components but, instead, reflected a typical diet consisting of a mixture of carbohydrates, protein, and fat. Meals of two constant volumes were used, and the calories were increased by adding a higher percentage of fat-rich components. Protein content increased between the 500- and 900-ml meals, although it was kept at a similar level within each volume. The 250-kcal meal consisted predominantly of carbohydrates, and the 3000-kcal meal consisted predominantly of fat. Thus, the macronutrient composition of the meals in our study did vary. Ghrelin reduction was significantly correlated with fat and calorie content. The finding that high fat meals elevated ghrelin was not reproduced by this study (17, 18).

Ghrelin concentrations in normal-weight and obese subjects reached their nadir at similar postprandial points. In this study, the calculated energy requirement for the obese subjects was higher than the normal-weight volunteers. Calorie-dependant reductions in plasma ghrelin were previously shown in normal-weight subjects when meal calorie content was calculated to be a fixed percentage of energy requirement (15). The meals selected in our study were of a fixed calorie content, independent of individual energy requirement, and caused a proportional reduction of ghrelin. It is unlikely that the higher energy requirement in the obese confounded our results because even a 3000-kcal meal in the obese suppressed ghrelin less than a 1000-kcal meal suppressed ghrelin in the normal-weight group (Table 2).

Ghrelin has been postulated to increase hunger by increasing neuropeptide Y and agouti-related protein in the hypothalamic arcuate nucleus (5). Obese humans take longer to reach satiety (21), yet they have lower circulating (9, 10) and lower production of ghrelin as suggested by reduced stomach ghrelin mRNA in *db/db* mice (22). The reasons for the reduced plasma and mRNA ghrelin levels are still unclear. Insulin may play a role because obese subjects who remain insulin sensitive have higher fasting ghrelin levels (11). Our study suggests that attenuated ghrelin suppression may act in concert with other gut hormone changes in insulin-resistant obese subjects, resulting in inhibition of satiety.

TABLE 2. Fasting and nadir mean plasma ghrelin (SEM) with changes from baseline after increasingly calorific meals

| Calories (kcal) | Normal weight           |                          |                                       | Obese                   |                          |                                       |
|-----------------|-------------------------|--------------------------|---------------------------------------|-------------------------|--------------------------|---------------------------------------|
|                 | Fast [pmol/liter (SEM)] | Nadir [pmol/liter (SEM)] | Change from baseline [pmol/liter (%)] | Fast [pmol/liter (SEM)] | Nadir [pmol/liter (SEM)] | Change from baseline [pmol/liter (%)] |
| 500-ml meal     |                         |                          |                                       |                         |                          |                                       |
| 250             | 1109 (93)               | 815 (81) <sup>a</sup>    | 293 (26)                              | 735 (89)                | 600 (71) <sup>a</sup>    | 135 (18)                              |
| 500             | 1146 (63)               | 886 (55) <sup>a</sup>    | 260 (23)                              | 744 (115)               | 633 (84) <sup>a</sup>    | 112 (15)                              |
| 1000            | 1122 (82)               | 750 (66) <sup>a</sup>    | 371 (33)                              | 770 (116)               | 615 (85) <sup>a</sup>    | 155 (20)                              |
| 900-ml meal     |                         |                          |                                       |                         |                          |                                       |
| 1000            | 1075 (38)               | 706 (63) <sup>a</sup>    | 369 (34)                              | 771 (122)               | 635 (117) <sup>a</sup>   | 124 (18)                              |
| 2000            | 1062 (31)               | 662 (47) <sup>a</sup>    | 400 (38)                              | 739 (81)                | 557 (67) <sup>a</sup>    | 182 (24)                              |
| 3000            | 1103 (60)               | 509 (21) <sup>a</sup>    | 594 (54)                              | 775 (130)               | 558 (92) <sup>a</sup>    | 217 (28)                              |

<sup>a</sup>  $P < 0.05$  compared to fasting.



Continuous exogenous administration of ghrelin to rodents leads to weight gain (2, 3). However, high ghrelin levels are not a feature of common obesity (9, 10). Reduction in hunger is associated with reduction in ghrelin levels after consumption of a mixed meal in normal-weight subjects (15). This postprandial ghrelin reduction was much reduced in the obese subjects we studied. A recent report indicated that obese individuals have delayed satiety and required approximately 255 kcal more than lean subjects to reach maximal satiety (21). As little as 100 kcal/d in excess of requirements may be enough to cause obesity and keep individuals trapped in the obese state (23). The reduced ghrelin response or insensitivity to calories ingested may thus contribute to the increased calories consumed by the obese. However, because basal ghrelin levels are already reduced in obese subjects, it is unclear how important this attenuated suppression in circulating ghrelin is.

The ghrelin system represents a target for antiobesity therapy. GH secretagogue receptor antagonists have been shown to reduce body weight gain in rodents (24); however, actual weight loss has not been shown. Ghrelin antagonists may have limited potential as antiobesity agents if endogenous plasma ghrelin levels are already low and are not suppressed after consumption of large mixed meals. The relative unresponsiveness to calories, as evidenced by the reduced ghrelin response, may further cause satiety signals to be reduced and could reinforce obesity.

### Acknowledgments

Received June 25, 2004. Accepted October 22, 2004.

Address all correspondence and requests for reprints to: Professor S. R. Bloom, Department of Metabolic Medicine, Imperial College London at Hammersmith campus, Du Cane Road, London W12 0NN, United Kingdom. E-mail: s.bloom@imperial.ac.uk.

### References

- Kojima M, Hosoda H, Date Y, Nakazato M, Matsuo H, Kangawa K 1999 Ghrelin is a growth-hormone-releasing acylated peptide from stomach. *Nature* 402:656–660
- Tschöp M, Smiley DL, Heiman ML 2000 Ghrelin induces adiposity in rodents. *Nature* 407:908–913
- Wren AM, Small CJ, Abbott CR, Dhillo WS, Seal LJ, Cohen MA, Batterham RL, Taheri S, Stanley SA, Ghatei MA, Bloom SR 2001 Ghrelin causes hyperphagia and obesity in rats. *Diabetes* 50:2540–2547
- Wren AM, Seal LJ, Cohen MA, Brynes AE, Frost GS, Murphy KG, Dhillo WS, Ghatei MA, Bloom SR 2001 Ghrelin enhances appetite and increases food intake in humans. *J Clin Endocrinol Metab* 86:5992
- Nakazato M, Murakami N, Date Y, Kojima M, Matsuo H, Kangawa K, Matsukura S 2001 A role for ghrelin in the central regulation of feeding. *Nature* 409:194–198
- Cummings DE, Purnell JQ, Frayo RS, Schmidova K, Wisse BE, Weigle DS 2001 A preprandial rise in plasma ghrelin levels suggests a role in meal initiation in humans. *Diabetes* 50:1714–1719
- Williams DL, Cummings DE, Grill HJ, Kaplan JM 2003 Meal-related ghrelin suppression requires postgastric feedback. *Endocrinology* 144:2765–2767
- Nedvidkova J, Krykorkova I, Bartak V, Papezova H, Gold PW, Alesci S, Pacak K 2003 Loss of meal-induced decrease in plasma ghrelin levels in patients with anorexia nervosa. *J Clin Endocrinol Metab* 88:1678–1682
- Cummings DE, Clement K, Purnell JQ, Vaisse C, Foster KE, Frayo RS, Schwartz MW, Basdevant A, Weigle DS 2002 Elevated plasma ghrelin levels in Prader Willi syndrome. *Nat Med* 8:643–644
- Tschöp M, Weyer C, Tataranni PA, Devanarayan V, Ravussin E, Heiman ML 2001 Circulating ghrelin levels are decreased in human obesity. *Diabetes* 50:707–709
- McLaughlin T, Abbasi F, Lamendola C, Frayo RS, Cummings DE 2004 Plasma ghrelin concentrations are decreased in insulin-resistant obese adults relative to equally obese insulin-sensitive controls. *J Clin Endocrinol Metab* 89:1630–1635
- English PJ, Ghatei MA, Malik IA, Bloom SR, Wilding JP 2002 Food fails to suppress ghrelin levels in obese humans. *J Clin Endocrinol Metab* 87:2984
- Shiiba T, Nakazato M, Mizuta M, Date Y, Mondal MS, Tanaka M, Nozoe S, Hosoda H, Kangawa K, Matsukura S 2002 Plasma ghrelin levels in lean and obese humans and the effect of glucose on ghrelin secretion. *J Clin Endocrinol Metab* 87:240–244
- Cummings DE, Weigle DS, Frayo RS, Breen PA, Ma MK, Dellinger EP, Purnell JQ 2002 Plasma ghrelin levels after diet-induced weight loss or gastric bypass surgery. *N Engl J Med* 346:1623–1630
- Callahan HS, Cummings DE, Pepe MS, Breen PA, Matthys CC, Weigle DS 2004 Postprandial suppression of plasma ghrelin level is proportional to ingested caloric load but does not predict intermeal interval in humans. *J Clin Endocrinol Metab* 89:1319–1324
- Levin BE, Dunn-Meynell AA, Ricci MR, Cummings DE 2003 Abnormalities of leptin and ghrelin regulation in obesity-prone juvenile rats. *Am J Physiol Endocrinol Metab* 285:E949–E957
- Erdmann J, Lippl F, Schusdziaira V 2003 Differential effect of protein and fat on plasma ghrelin levels in man. *Regul Pept* 116:101–107
- Erdmann J, Tropsch R, Lippl F, Gussmann P, Schusdziaira V 2004 Postprandial response of plasma ghrelin levels to various test meals in relation to food intake, plasma insulin, and glucose. *J Clin Endocrinol Metab* 89:3048–3054
- Matthews DR, Hosker JP, Rudenski AS, Naylor BA, Treacher DF, Turner RC 1985 Homeostasis model assessment: insulin resistance and  $\beta$ -cell function from fasting plasma glucose and insulin concentrations in man. *Diabetologia* 28:412–419
- Monteleone P, Bencivenga R, Longobardi N, Serritella C, Maj M 2003 Differential responses of circulating ghrelin to high-fat or high-carbohydrate meal in healthy women. *J Clin Endocrinol Metab* 88:5510–5514
- Delgado-Aros S, Cremonini F, Castillo JE, Chial HJ, Burton DD, Ferber I, Camilleri M 2004 Independent influences of body mass and gastric volumes on satiation in humans. *Gastroenterology* 126:432–440
- Toshinai K, Mondal MS, Nakazato M, Date Y, Murakami N, Kojima M, Kangawa K, Matsukura S 2001 Upregulation of ghrelin expression in the stomach upon fasting, insulin-induced hypoglycemia, and leptin administration. *Biochem Biophys Res Commun* 281:1220–1225
- Hill JO, Wyatt HR, Reed GW, Peters JC 2003 Obesity and the environment: where do we go from here? *Science* 299:853–855
- Asakawa A, Inui A, Kaga T, Katsuura G, Fujimiya M, Fujino MA, Kasuga M 2003 Antagonism of ghrelin receptor reduces food intake and body weight gain in mice. *Gut* 52:947–952
